# Supplementary material
Source: publisher figshare collection journal article supplement (https://tandf.figshare.com/ndownloader/files/36009801)
Supplement: Supplementary file 1 [file 36009801]

**Table S1 Accession Ids and analysis of the Chal_sti_synt_N and Chal_sti_synt_C domains in all the PeqPKS, DcaPKS and AshPKS sequences**

| *Phalaenopsis equestris* | | | | | | | | | | | | |
| --- | --- | --- | --- | --- | --- | --- | --- | --- | --- | --- | --- | --- |
| **Sequence Name** | **Accession Id** | **Chal_sti_synt_N domain** | | | | | **Chal_sti_synt_C domain** | | | | | |
|  | | **Start** | | **End** | **E-value** | | **Start** | | **End** | | **E-value** | |
| PeqPKS01 | XP_020571230.1 | 5 | | 230 | 1.30E-120 | | 240 | | 390 | | 6.70E-73 | |
| PeqPKS02 | XP_020591420.1 | 2 | | 225 | 4.00E-92 | | 236 | | 386 | | 1.50E-60 | |
| PeqPKS03 | XP_020572030.1 | 4 | | 228 | 2.60E-99 | | 239 | | 389 | | 5.30E-64 | |
| PeqPKS04 | XP_020572025.1 | 5 | | 231 | 7.50E-97 | | 242 | | 392 | | 8.80E-64 | |
| PeqPKS05 | XP_020572026.1 | 4 | | 228 | 2.80E-99 | | 239 | | 389 | | 4.40E-63 | |
| *Dendrobium catenatum* | | | | | | | | | | | | |
| DcaPKS01 | XP_028548381.1 | 6 | | 230 | | 6.60E-123 | 240 | 390 | | 4.20E-72 | | |
| DcaPKS02 | XP_020693902.1 | 5 | | 229 | | 1.30E-124 | 239 | 389 | | 1.40E-72 | | |
| DcaPKS03 | XP_020690160.1 | 30 | | 251 | | 6.20E-102 | 262 | 414 | | 8.40E-61 | | |
| DcaPKS04 | XP_020691094.2 | 48 | | 272 | | 1.30E-91 | 283 | 435 | | 9.20E-53 | | |
| DcaPKS05 | XP_020690097.1 | 4 | | 228 | | 2.70E-99 | 239 | 389 | | 5.30E-61 | | |
| DcaPKS06 | XP_020690099.2 | 4 | | 228 | | 9.90E-99 | 239 | 389 | | 5.20E-61 | | |
| DcaPKS07 | XP_020704102.1 | 4 | | 228 | | 8.80E-95 | 239 | 387 | | 6.00E-57 | | |
| DcaPKS08 | XP_020704098.1 | 4 | | 228 | | 1.90E-98 | 239 | 389 | | 4.00E-62 | | |
| *Apostasia shenzhenica* | | | | | | | | | | | | |
| AshPKS01 | PKA56868.1 | 5 | 229 | | | 3.40E-121 | 239 | 389 | | | | 1.70E-73 |
| AshPKS02 | PKA51028.1 | 4 | 228 | | | 1.90E-111 | 238 | 388 | | | | 2.40E-68 |
| AshPKS03 | PKA45887.1 | 8 | 228 | | | 3.00E-94 | 236 | 405 | | | | 6.80E-48 |
| AshPKS04 | PKA66411.1 | 1 | 157 | | | 4.10E-76 | 168 | 333 | | | | 7.10E-59 |
| AshPKS05 | PKA53999.1 | 7 | 230 | | | 1.30E-93 | 241 | 391 | | | | 1.20E-63 |
| AshPKS06 | PKA56805.1 | 7 | 231 | | | 1.10E-91 | 240 | 390 | | | | 2.70E-62 |
